# Supplementary material
Source: PubMed Central journal article supplement (PMC4333063)

# Supplemental Figure 1

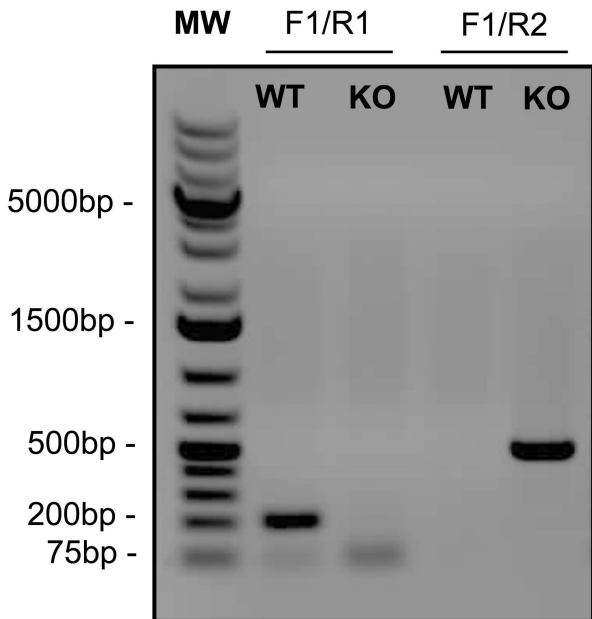

# Supplemental Figure 2

**A**

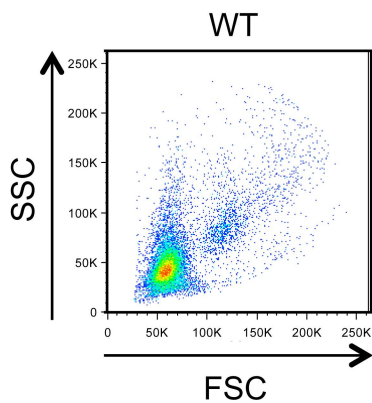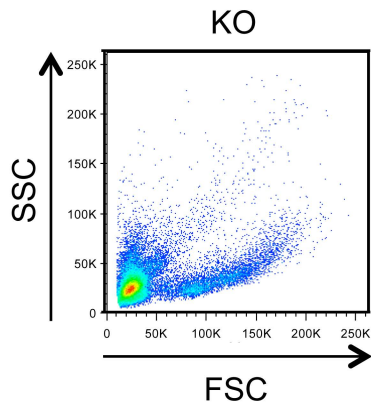

**B**

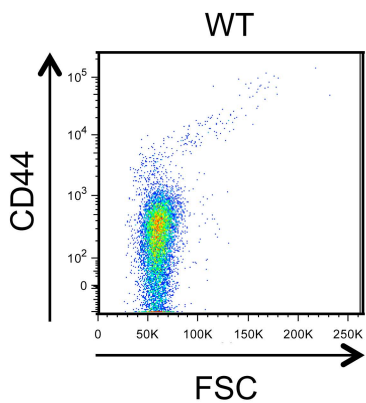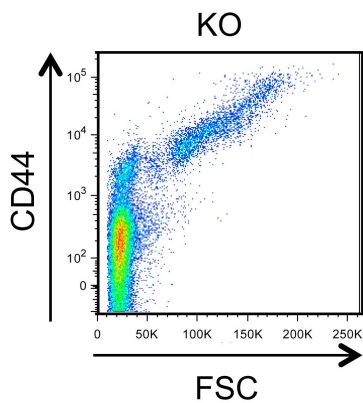

Supplement: NIHMS649665-supplement-Supp_FigureS1-S2.pdf [file NIHMS649665-supplement-Supp_FigureS1-S2.pdf]
